# Supplementary material
Source: Elsevier journal article supplement (https://authors.library.caltech.edu/50166/8/mmc2.pdf)

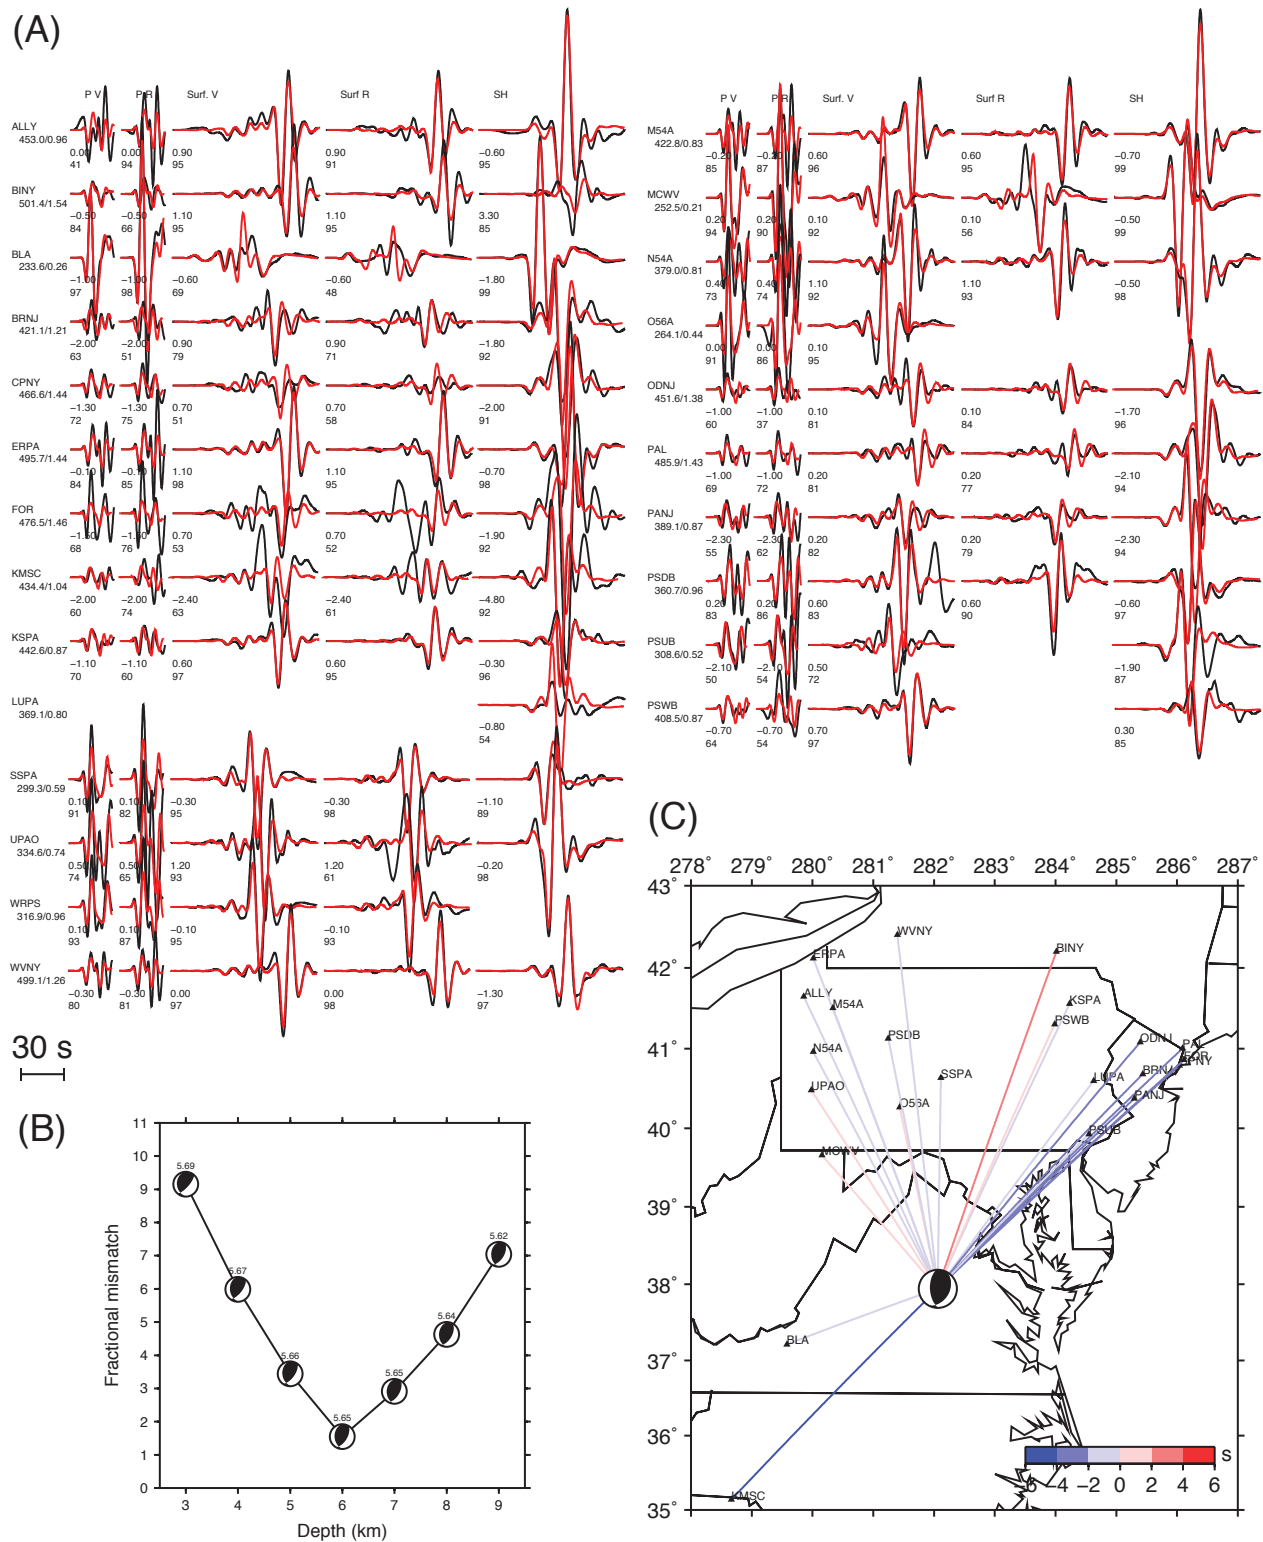

Figure S1

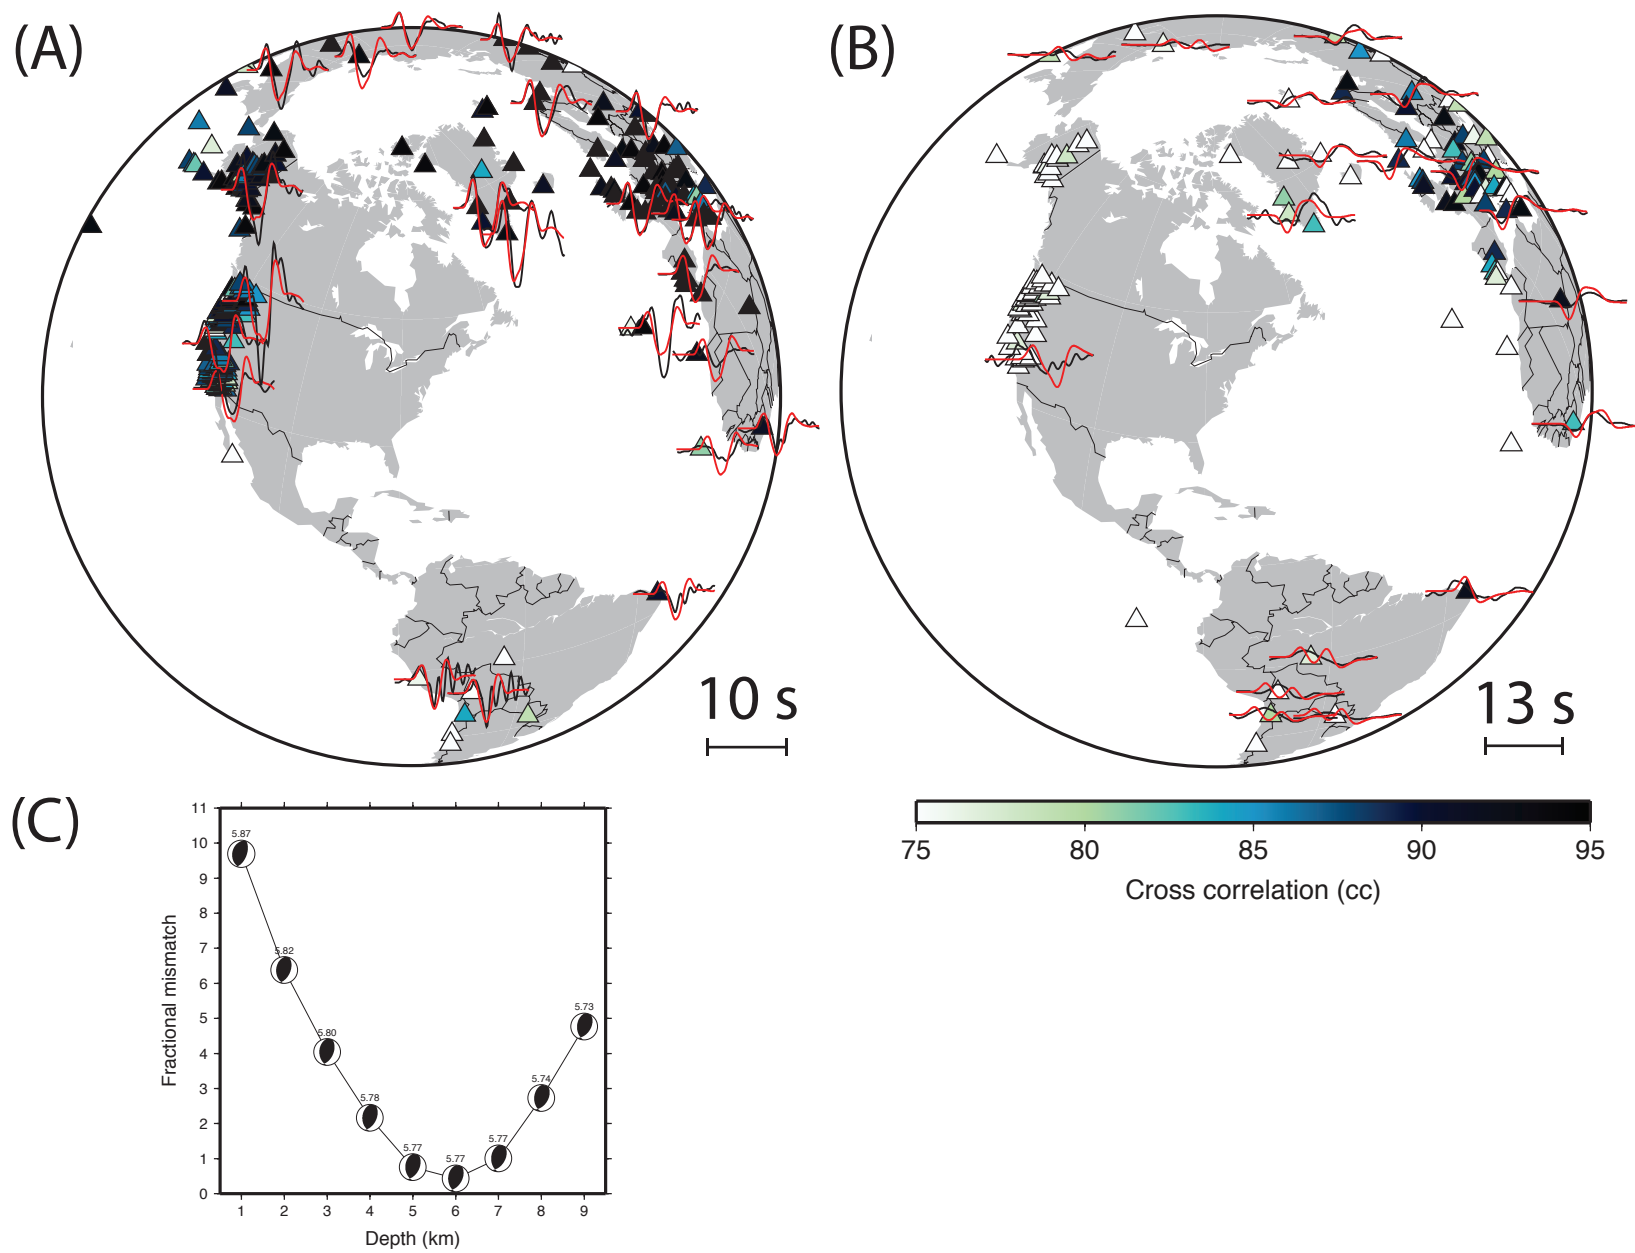

Figure S2

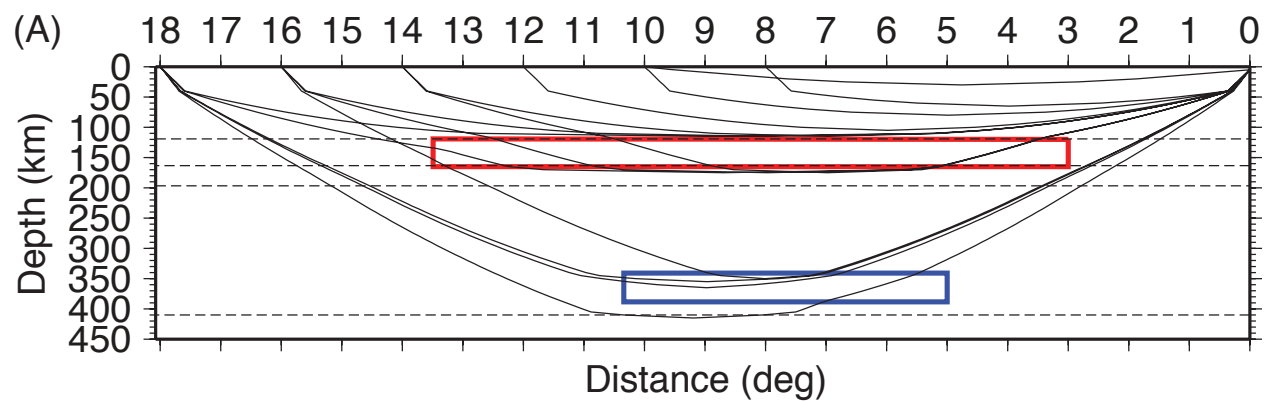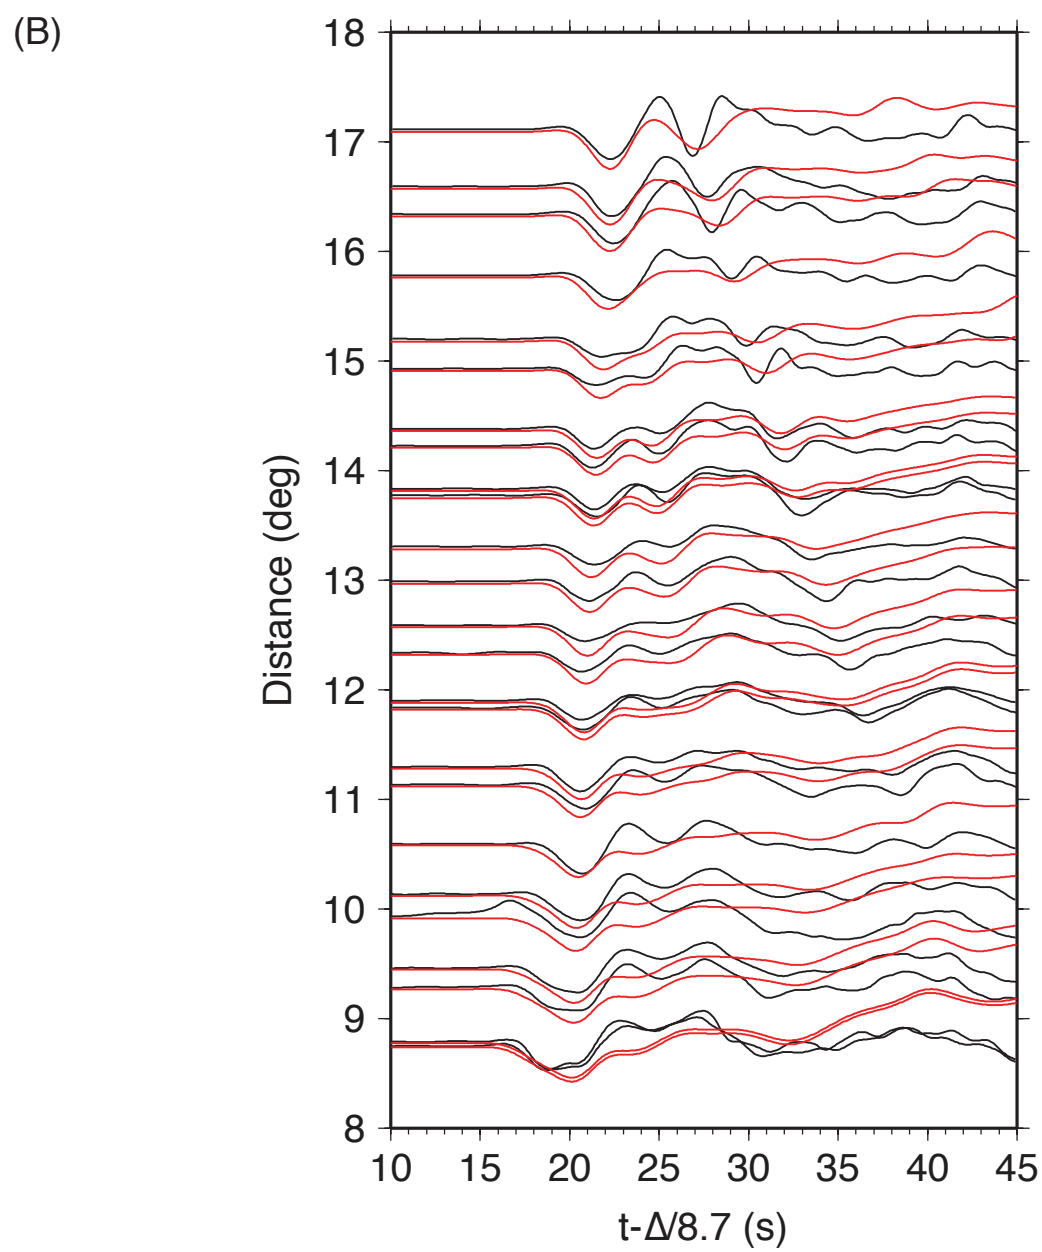

Figure S3

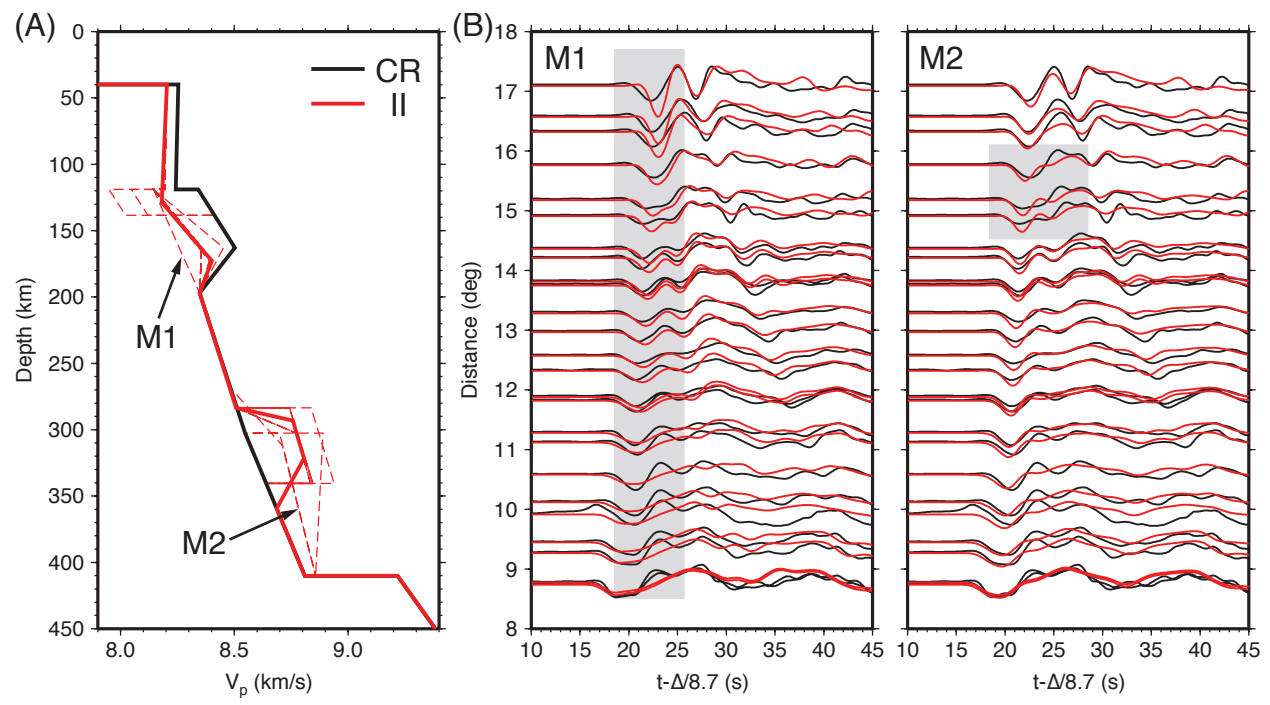

Figure S4

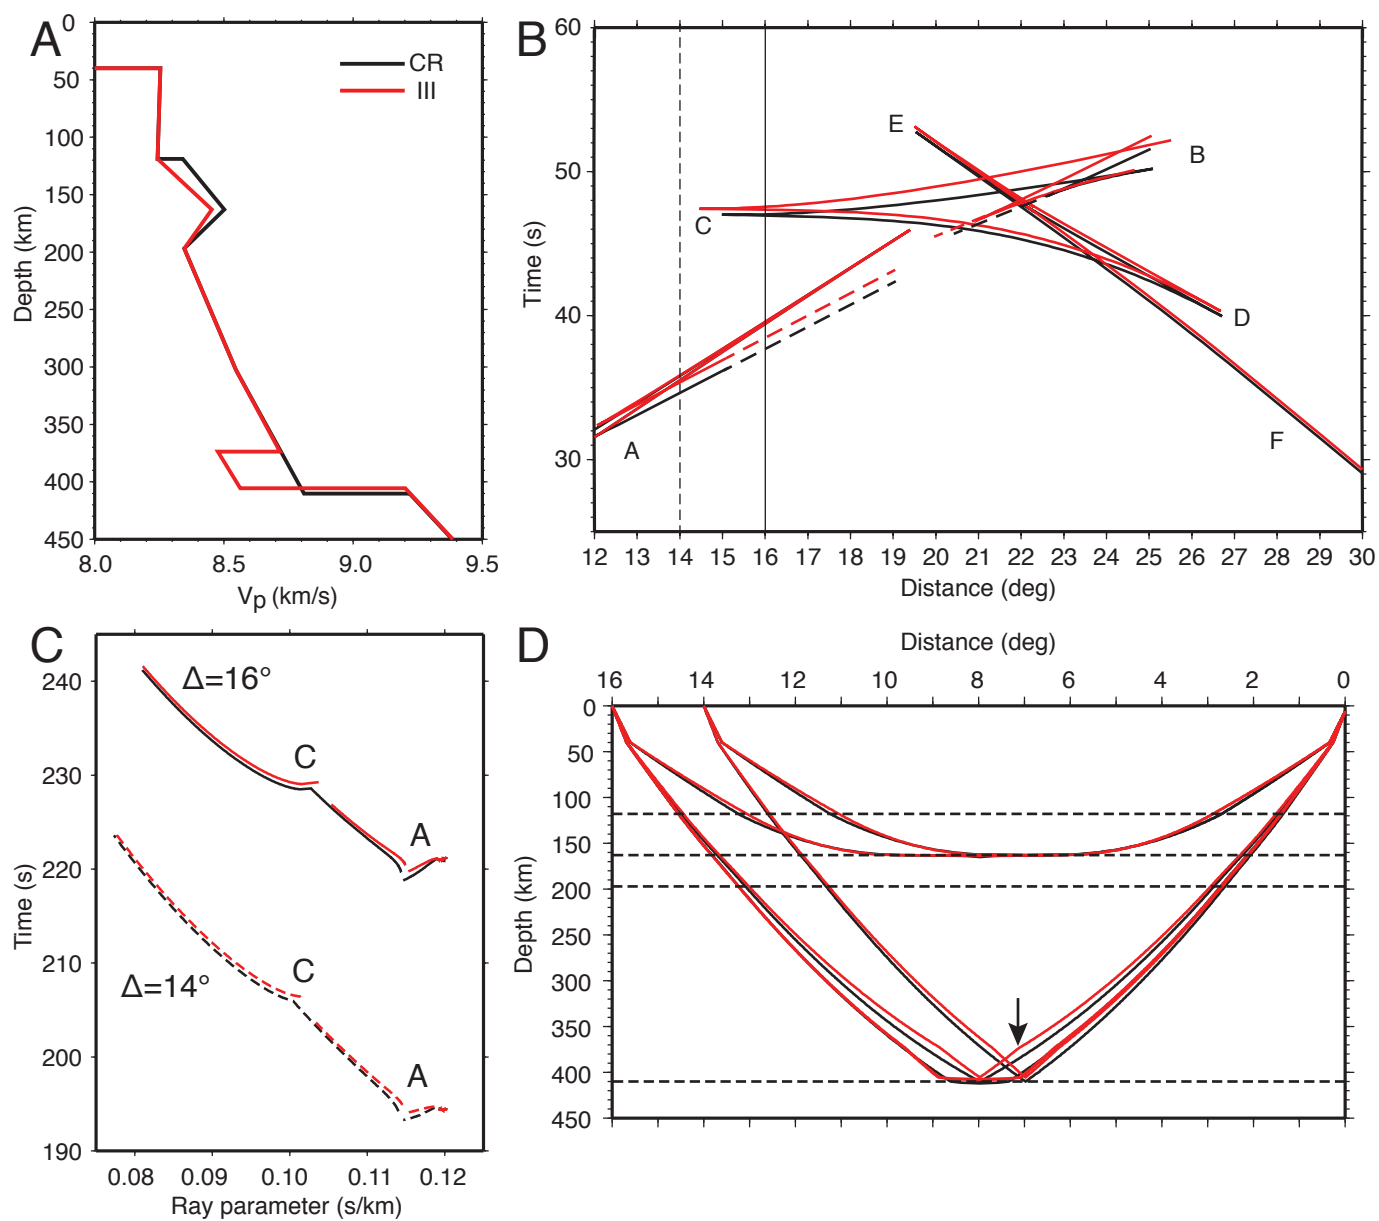

Figure S5

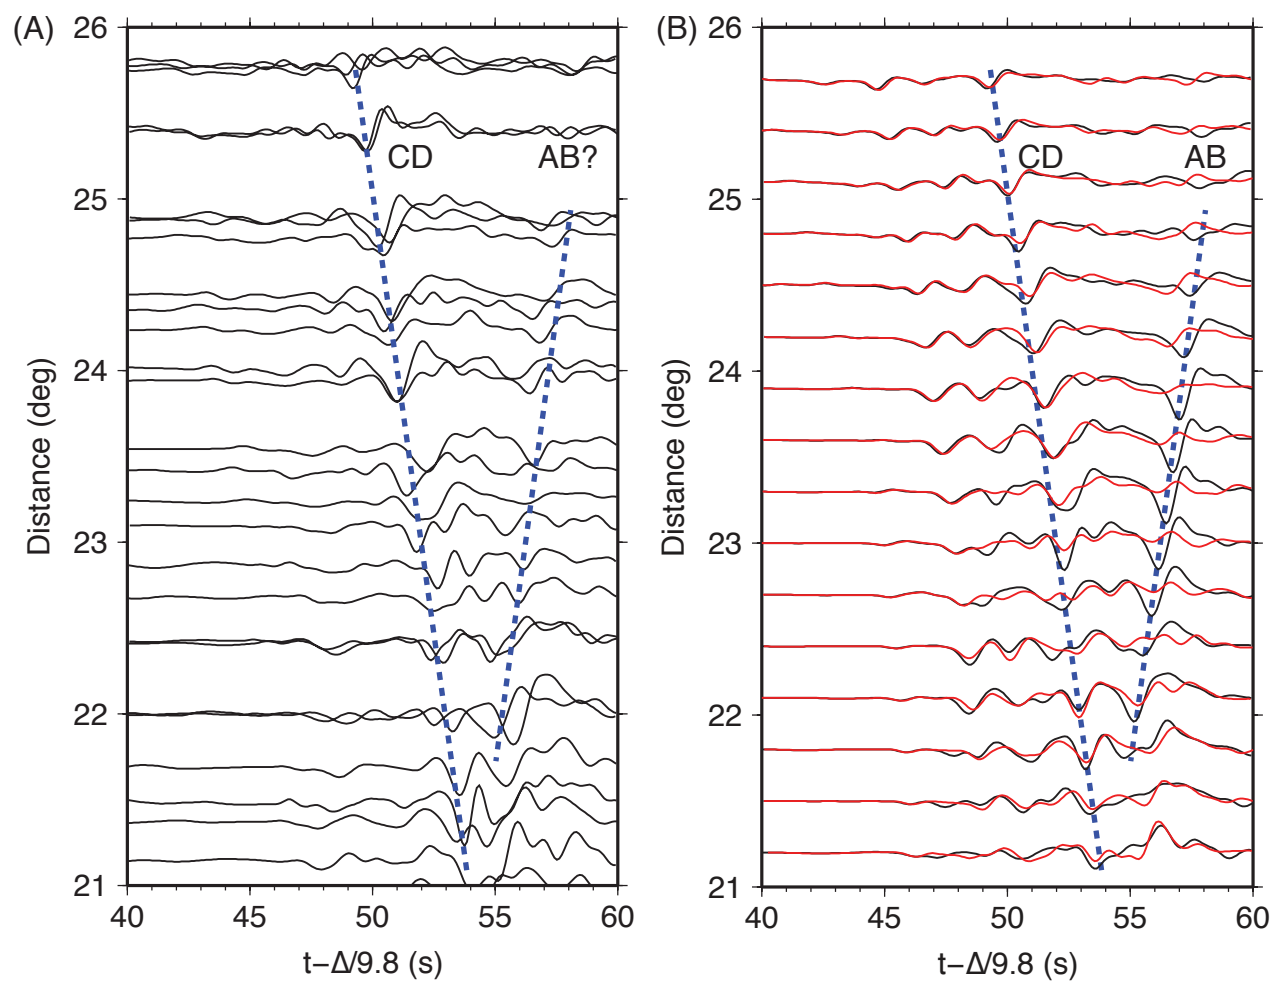

Figure S6

Supplement: mmc2 [file mmc2.pdf]
